# Supplementary material for: Associations between power Doppler ultrasound findings and B-mode synovitis and clinical arthritis in juvenile idiopathic arthritis using a standardised scanning approach and scoring system
Source: HighWire-hosted journal article supplement (doi:10.1136/rmdopen-2022-002937), 2023-03-01
Supplement: rmdopen-2022-002937supp001_data_supplement.pdf [file rmdopen-2022-002937supp001_data_supplement.pdf]

**Supplementary Figure 1.** Flowchart of joint region assessment by B-mode (BM) and power Doppler (PD) ultrasound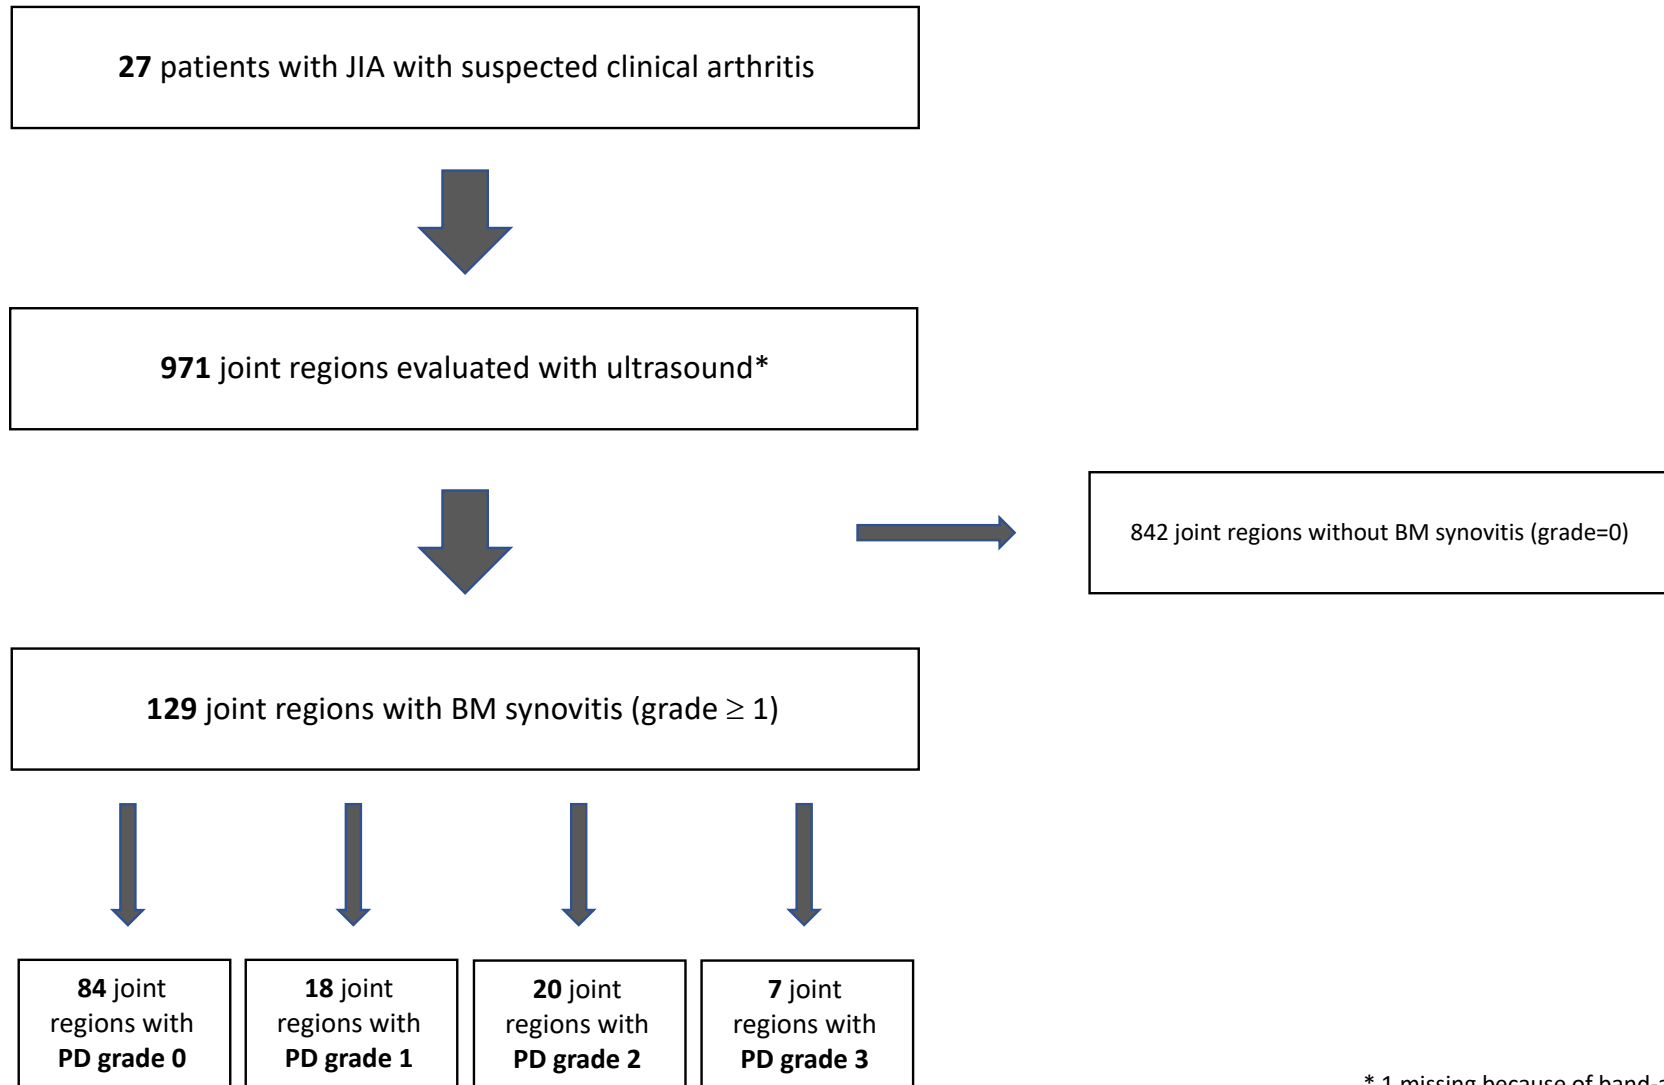

\* 1 missing because of band-aid in the elbow
